# Supplementary figures and images for: Genome Characterization of Nocturne116, Novel Lactococcus lactis-Infecting Phage Isolated from Moth
Source: MDPI journal article supplement (doi:10.3390/microorganisms9071540), 2021-07-20

0 0.25 0.5 0.75  
Intergenomic distance

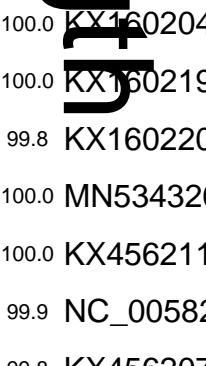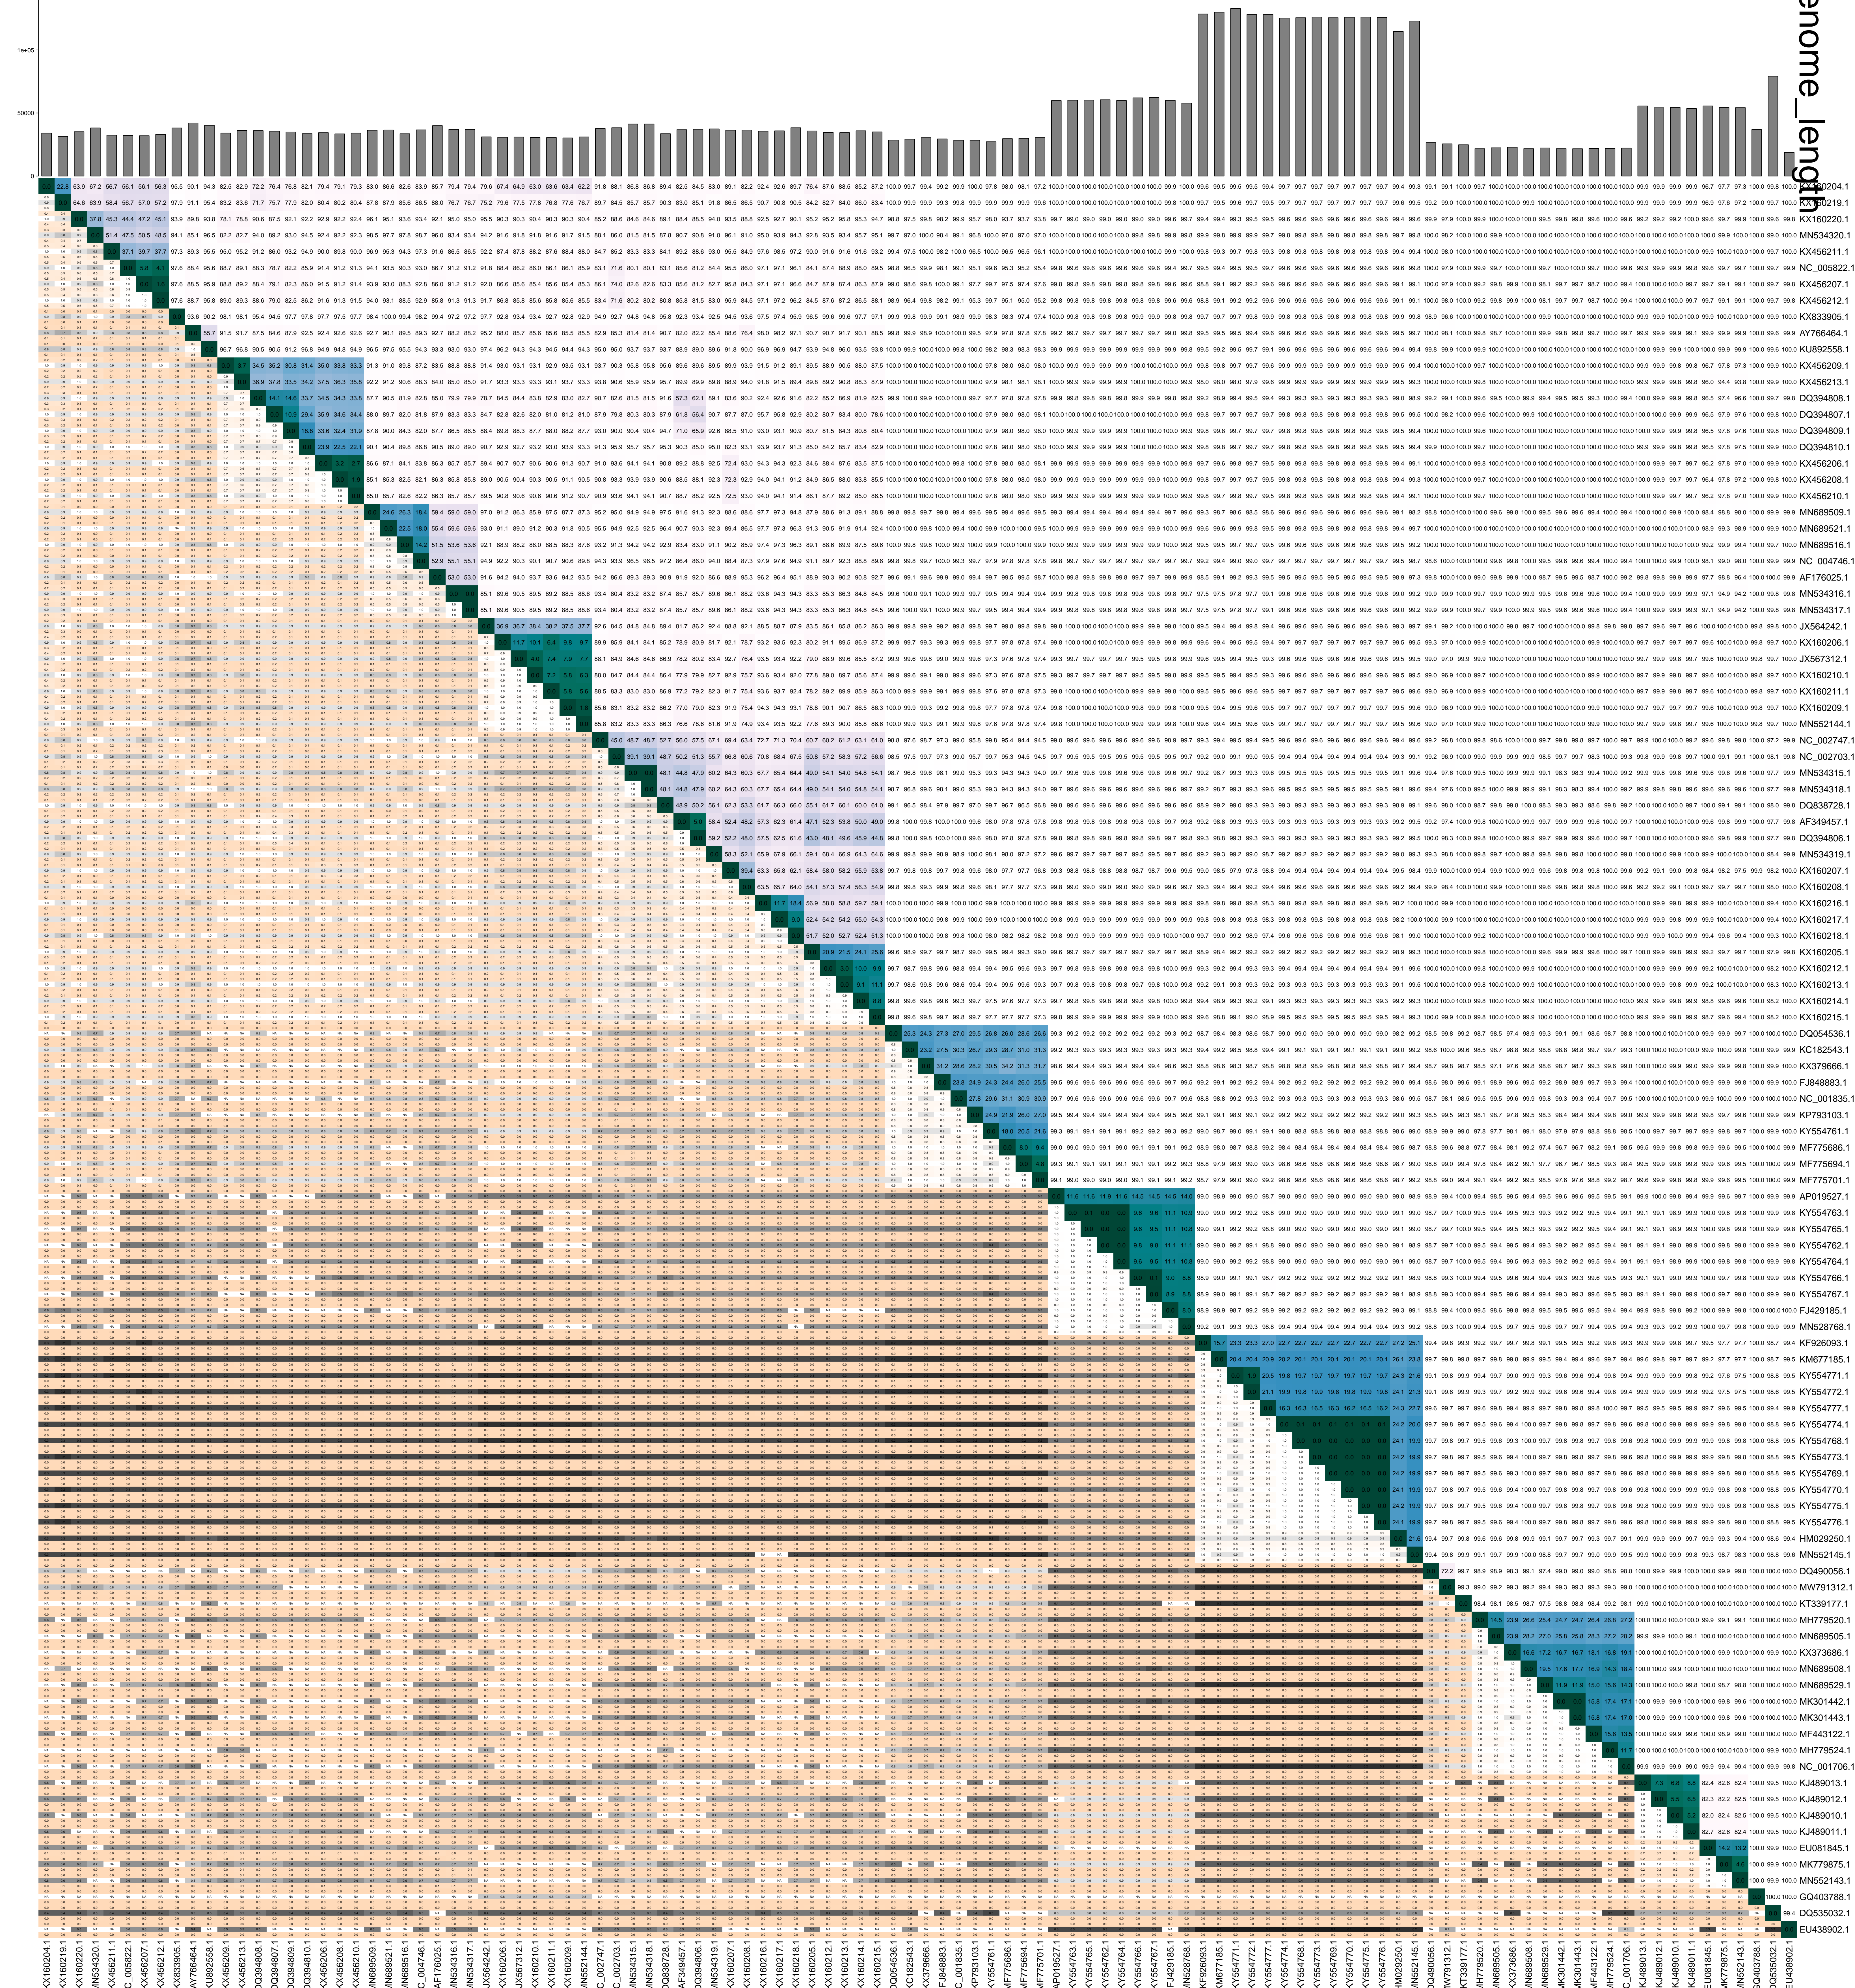

Supplement: s1 [file s1]
